# Supplementary material for: Piezo-photocatalytic properties of BaTiO3/CeO2 nanoparticles with heterogeneous structure synthesized by a gel-assisted hydrothermal method
Source: Royal Society of Chemistry journal article supplement (doi:10.1039/d3ra04014c), 2023-01-01
Supplement: d3ra04014c1.pdf [file d3ra04014c1.pdf]

# Piezo-photocatalytic Properties of BaTiO<sub>3</sub>/CeO<sub>2</sub> Nanoparticles with Heterogeneous Structure Synthesized by Gel-assisted Hydrothermal Method

Xia Li <sup>1, a, b</sup>, Hongjuan Zheng <sup>1, a, c</sup>, Jingjin Liu<sup>e</sup>, Hongcheng Li <sup>a, b</sup>, Jing Wang <sup>a, c</sup>, Kang Yan <sup>a, c</sup>,  
Jingsong Liu <sup>b</sup>, Feng Dang <sup>d</sup> and Kongjun Zhu <sup>\*, a, c</sup>

<sup>a</sup> State Key Laboratory of Mechanics and Control for Aerospace Structures, Nanjing University of Aeronautics and Astronautics, Nanjing 210016, P. R. China

<sup>b</sup> College of Materials Science and Technology, Nanjing University of Aeronautics and Astronautics, Nanjing 210016, P. R. China

<sup>c</sup> College of Aerospace Engineering, Nanjing University of Aeronautics and Astronautics, Nanjing 210016, P. R. China

<sup>d</sup> Key Laboratory for Liquid-Solid Structural Evolution & Processing of Materials (Ministry of Education) Shandong University, Jinan 250061, P. R. China

<sup>e</sup> School of General Education, Wuchang University of Technology, Wuhan 430223, P. R. China

<sup>1</sup> Co-first author

\* Corresponding author

E-mail: kjzhu@nuaa.edu.cn

Tel.: 86-25-84895982

Fax.: 86-25-84895759

Table S1 A comparison of some piezo-photocatalysts in applications of pollutant degradation.

| Catalyst                                                       | Morphology                | $E_g$   | Amount of catalyst | Pollutant                               | Degradation rate<br>[Rate(%)-time] | Catalytic conditions                                                    | Ref.      |
|----------------------------------------------------------------|---------------------------|---------|--------------------|-----------------------------------------|------------------------------------|-------------------------------------------------------------------------|-----------|
| BiOBr/BTO                                                      | Nanoplates<br>~ 380 nm    | ————    | 10 mg              | MO<br>[50 ml, 10 mg·L <sup>-1</sup> ]   | 100% -30 min                       | Xe lamp [300 W] + ultrasonic<br>[—, 40 kHz]                             | [1]       |
| BiVO <sub>4</sub> :I/BTO-Ag                                    | Rice-like<br>—            | ————    | 20 mg              | RhB<br>[50 ml, 10 mg·L <sup>-1</sup> ]  | 55% - 15 min                       | Xe lamp [300 W] + ultrasonic<br>[150 W, 40 kHz]                         | [2]       |
| BT/Ag <sub>2</sub> O                                           | Nanocubes<br>~70 nm       | 3.27 eV | 20 mg              | RhB<br>[20 ml, 15 mg·L <sup>-1</sup> ]  | 100%-1.5 h                         | Mercury lamp [30.4 mW·cm <sup>-2</sup> ] + ultrasonic<br>[50 W, 27 kHz] | [3]       |
| BT@TiO <sub>2</sub>                                            | Nanowires<br>> 2μm        | 3.19 eV | 50 mg              | RhB<br>[100 ml, 30 mg·L <sup>-1</sup> ] | 99.5% -75 min                      | Xe lamp [300 W] + ultrasonic<br>[120 W, 45 kHz]                         | [4]       |
| (Ag-Ag <sub>2</sub> S)/BaTiO <sub>3</sub>                      | Nanoparticles<br>~ 100 nm | ————    | 50 mg              | MO<br>[50 ml, 0.01 mM]                  | 90% - 30 min                       | Xe lamp [300 W] + ultrasonic<br>[—, —]                                  | [5]       |
| 1mAg-BaTiO <sub>3</sub>                                        | Nanoparticles<br>~ 100 nm | ————    | 50 mg              | RhB<br>[50 ml, 0.01mM]                  | 83% - 75 min                       | Xe lamp [300 W] + ultrasonic<br>[—, —]                                  | [6]       |
| BaTiO <sub>3</sub> /TiO <sub>2</sub>                           | Nanofibers<br>—           | 3.13 eV | 100 mg             | RhB<br>[—, —]                           | 100% -60 min                       | Hg lamp [250 W] + ultrasonic<br>[300 W, 40 kHz]                         | [7]       |
| BTO/STO-10                                                     | Nanofibers<br>—           | 3.10 eV | 100 mg             | RhB<br>[100 ml, 1 mg·L <sup>-1</sup> ]  | 97.8% - 30 min                     | LED UV lamp [30 W] + ultrasonic<br>[300 W, 40 kHz]                      | [8]       |
| BT@C-0.001M                                                    | Nanoparticles<br>~ 500 nm | 3.16 eV | 100 mg             | RhB<br>[100 ml, 10 mg/L]                | 100%-100 min                       | Xe lamp [300 W] + ultrasonic<br>[120 W, 40 kHz]                         | [9]       |
| BaTiO <sub>3</sub> /CeO <sub>2</sub><br>[Ti/Ce = 0.875:0.125 ] | Nanoparticles<br>~ 300nm  | 3.21 eV | 100 mg             | RhB<br>[100 ml, 10 mg/L]                | ~70% -120min                       | Xe lamp [300 W] + ultrasonic<br>[120 W, 40 kHz]                         | This work |

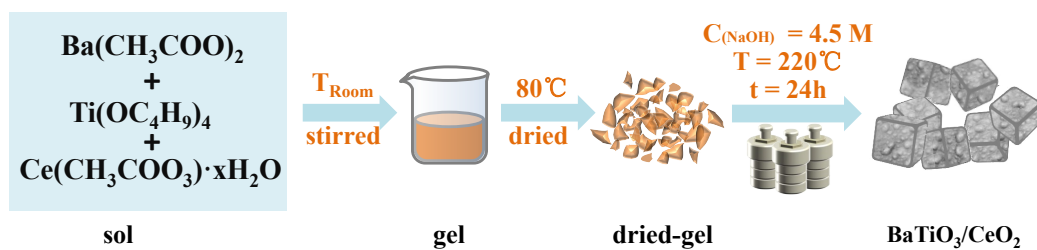

Fig. S1 Schematic of BT<sub>x</sub>Ce<sub>y</sub> nanoparticles synthesis route

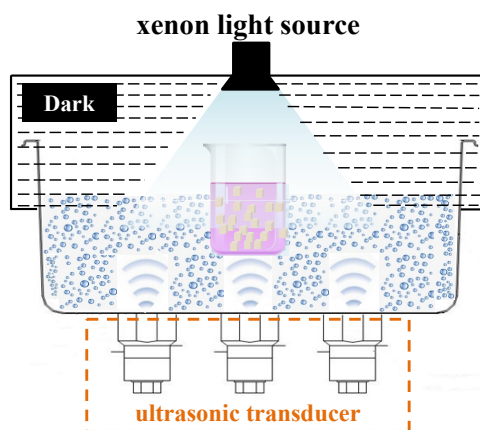

Fig. S2 Device diagram of the Piezo-photocatalytic test

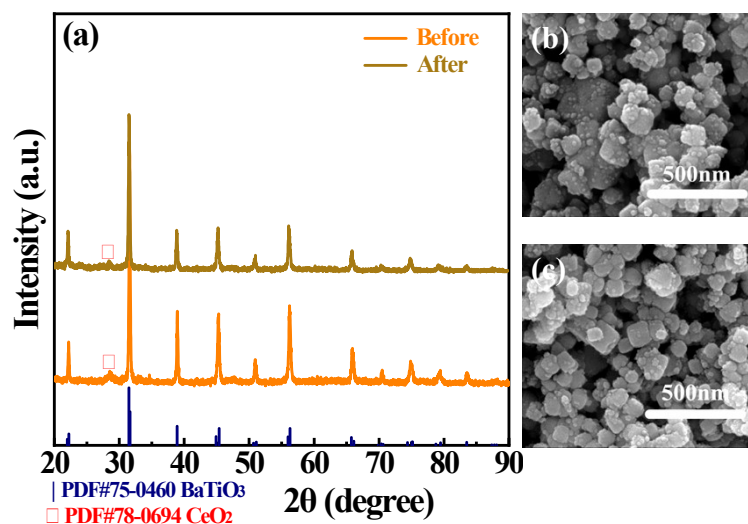

Fig. S3 XRD patterns (a), SEM images of BaTiO<sub>3</sub>/CeO<sub>2</sub>-3 before (b) and after (c) piezo-photocatalytic cycles (3 times)

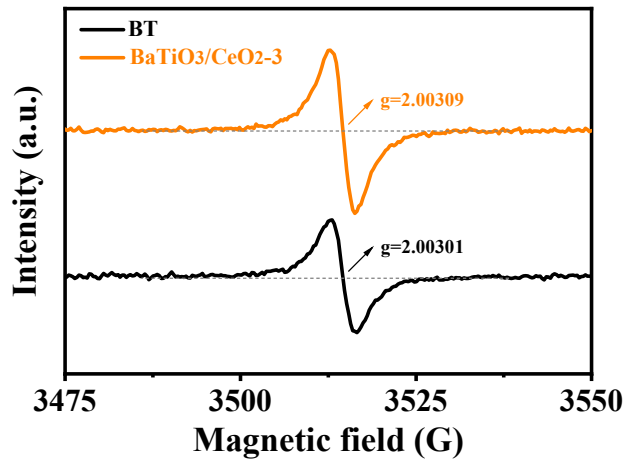

Fig. S4 EPR spectra of BT and BaTiO<sub>3</sub>/CeO<sub>2</sub>-3 nanoparticles

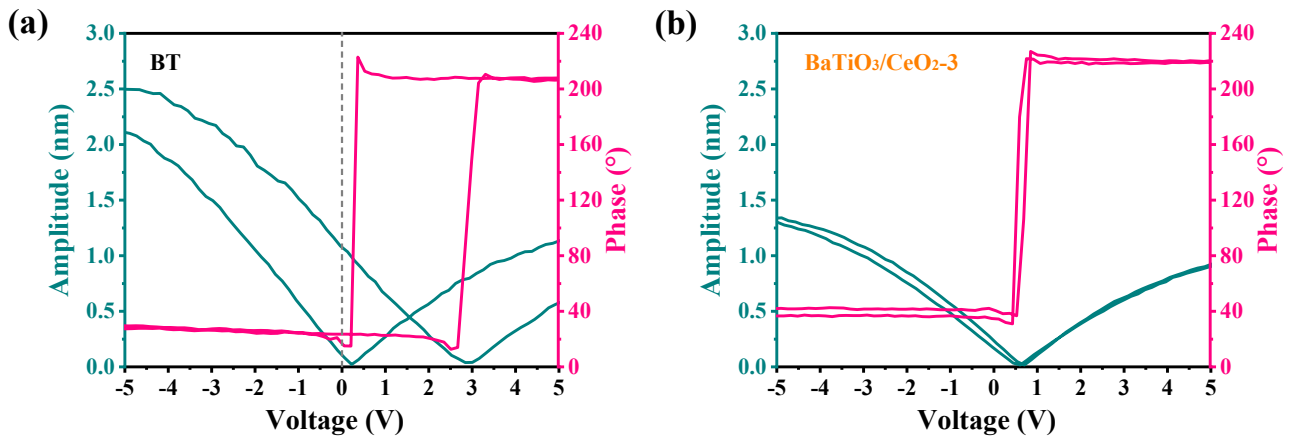

Fig. S5 Piezoelectric characterization of BT and BaTiO<sub>3</sub>/CeO<sub>2</sub>-3 by PFM. Piezoelectric response phase curve (pink color) and amplitude curve (cyan color) of BT (a) and BaTiO<sub>3</sub>/CeO<sub>2</sub>-3 (b) with voltage from +5 V to -5 V.

## References

- [1] X. Zhou, F. Yan, S. Wu, B. Shen, H. Zeng, J. Zhai, Remarkable Piezophoto Coupling Catalysis Behavior of BiOX/BaTiO<sub>3</sub> (X = Cl, Br, Cl<sub>0.166</sub>Br<sub>0.834</sub>) Piezoelectric Composites, *Small*. 16 (2020) 1–15. doi:10.1002/sml.202001573.
- [2] X. Zhou, B. Shen, J. Zhai, N. Hedin, Reactive Oxygenated Species Generated on Iodide-Doped BiVO<sub>4</sub>/BaTiO<sub>3</sub> Heterostructures with Ag/Cu Nanoparticles by Coupled Piezophototronic Effect and Plasmonic Excitation, *Adv. Funct. Mater.* 31 (2021) 1–14. doi:10.1002/adfm.202009594.
- [3] H. Li, Y. Sang, S. Chang, X. Huang, Y. Zhang, R. Yang, H. Jiang, H. Liu, Z.L. Wang, Enhanced Ferroelectric-Nanocrystal-Based Hybrid Photocatalysis by Ultrasonic-Wave-Generated Piezophototronic Effect, *Nano Lett.* 15 (2015) 2372–2379. doi:10.1021/nl504630j.
- [4] Q. Liu, D. Zhai, Z. Xiao, C. Tang, Q. Sun, C.R. Bowen, H. Luo, D. Zhang, Piezo-photoelectronic coupling effect of BaTiO<sub>3</sub>@TiO<sub>2</sub> nanowires for highly concentrated dye degradation, *Nano Energy*. 92 (2022). doi:10.1016/j.nanoen.2021.106702.
- [5] Y. Lei, S. Xu, M. Ding, L. Li, Q. Sun, Z.L. Wang, Enhanced Photocatalysis by Synergistic Piezotronic Effect and Exciton–Plasmon Interaction Based on (Ag-Ag<sub>2</sub>S)/BaTiO<sub>3</sub> Heterostructures, *Adv. Funct. Mater.* 2005716 (2020) 1–9. doi:10.1002/adfm.202005716.
- [6] S. Xu, Z. Liu, M. Zhang, L. Guo, Piezotronics enhanced photocatalytic activities of Ag-BaTiO<sub>3</sub> plasmonic photocatalysts, *J. Alloys Compd.* 801 (2019) 483–488. doi:10.1016/j.jallcom.2019.06.115.
- [7] J. Wu, W. Wang, Y. Tian, C. Song, H. Qiu, H. Xue, Piezotronic effect boosted photocatalytic performance of heterostructured BaTiO<sub>3</sub>/TiO<sub>2</sub> nanofibers for degradation of organic pollutants, *Nano Energy*. 77 (2020) 105122. doi:10.1016/j.nanoen.2020.105122.
- [8] X. Liu, X. Shen, B. Sa, Y. Zhang, X. Li, H. Xue, Piezotronic-enhanced photocatalytic performance of heterostructured BaTiO<sub>3</sub>/SrTiO<sub>3</sub> nanofibers, *Nano Energy*. 89 (2021) 1–9. doi:10.1016/j.nanoen.2021.106391.
- [9] H. Zheng, X. Li, K. Zhu, P. Liang, M. Wu, Y. Rao, R. Jian, F. Shi, J. Wang, K. Yan, J. Liu, Semiconducting BaTiO<sub>3</sub>@C core-shell structure for improving piezo-photocatalytic performance, *Nano Energy*. 93 (2022) 106831. doi:10.1016/j.nanoen.2021.106831.
